# Supplementary material
Source: MDPI journal article supplement (https://www.mdpi.com/1996-1073/12/23/4502)
Supplement: s1 [file s1]

*Supporting Information*

# Life Cycle Assessment and Techno-Economic Analysis of Pressure Sensitive Bio-Adhesive Production

**Minliang Yang and Kurt A. Rosentrater \***

Department of Agricultural and Biosystems Engineering, Iowa State University, Ames, IA 50011, USA;  
minlyang0909@gmail.com

\* Correspondence: karosent@iastate.edu

**Table S1.** Electricity sources in Iowa, 2016 (adapted from [26]).

| Energy Source              | Percentage |
|----------------------------|------------|
| Fossil fuels               | 57.83%     |
| Hydroelectric              | 17.81%     |
| Wind                       | 13.82%     |
| Nuclear                    | 3.65%      |
| Wood and wood-derived fuel | 2.41%      |
| Solar Photovoltaic         | 1.95%      |
| Geothermal                 | 1.01%      |
| Landfill gas               | 0.67%      |
| Biogenic municipal waste   | 0.44%      |

**Table S2.** Assumptions of total capital investment ( $C_{TCI}$ ) in the pressure sensitive bio-adhesive production plant.

| Parameters                                 | Assumptions                     | Sources                    |
|--------------------------------------------|---------------------------------|----------------------------|
| 1. Direct fixed capital cost ( $C_{DFC}$ ) | $C_{DC} + C_{IC} + C_{OC}$      |                            |
| (1) Direct cost ( $C_{DC}$ )               |                                 |                            |
| Equipment purchase cost ( $C_{PC}$ )       |                                 | SuperPro Designer database |
| Piping                                     | $0.68 \times C_{PC}$            | [32]                       |
| Instrumentation                            | $0.50 \times C_{PC}$            | [32]                       |
| Insulation                                 | $0.03 \times C_{PC}$            | [32]                       |
| Electrical facilities                      | $0.30 \times C_{PC}$            | [32]                       |
| Building                                   | $0.45 \times C_{PC}$            | [32]                       |
| Yard improvement                           | $0.20 \times C_{PC}$            | [32]                       |
| Auxiliary facilities                       | $0.55 \times C_{PC}$            | [32]                       |
| Installation                               | $0.55 \times C_{PC}$            | [32]                       |
| Land                                       | $0.08 \times C_{PC}$            | [32]                       |
| (2) Indirect cost ( $C_{IC}$ )             |                                 |                            |
| Engineering                                | $0.30 \times C_{DC}$            | [52]                       |
| Construction                               | $0.35 \times C_{DC}$            | [52]                       |
| (3) Other cost ( $C_{OC}$ )                |                                 |                            |
| Contractor's fee                           | $0.06 \times (C_{DC} + C_{IC})$ | [32]                       |
| Contingency                                | $0.08 \times (C_{DC} + C_{IC})$ | [32]                       |
| 2. Working capital ( $C_W$ )               | $0.15 \times C_{DFC}$           | [33]                       |
| 3. Start-up and validation cost ( $C_S$ )  | $0.10 \times C_{DFC}$           | [32]                       |

**Table S3.** Assumptions of annual operating cost (CAOC) in the pressure sensitive bio-adhesive production plant.

| Parameters                    | Assumptions           | Sources                    |
|-------------------------------|-----------------------|----------------------------|
| 1. Material cost ( $C_M$ )    |                       |                            |
| Glycerol                      | 1.04 \$/kg            | [35]                       |
| Acrylic acid                  | 0.90 \$/kg            | [53]                       |
| Phenothazine (PTZ)            | 11.30 \$/kg           | [53]                       |
| Amberlyst 15                  | 104.00 \$/kg          | [53]                       |
| Ethanethiol                   | 5.48 \$/kg            | [53]                       |
| Carbon disulfide              | 1.37 \$/kg            | [53]                       |
| 3-chloro-2-butanone           | 35.22 \$/kg           | [53]                       |
| Acetone                       | 0.10 \$/kg            | [53]                       |
| Azobisisobutyronitrile (AIBN) | 5.81 \$/kg            | [53]                       |
| 4, 4'-Azobis                  | 565.00 \$/kg          | [53]                       |
| Potassium hydroxide (KOH)     | 1.05 \$/kg            | [53]                       |
| Isosorbide                    | 71.00 \$/kg           | [53]                       |
| Succinic anhydride            | 5.00 \$/kg            | [53]                       |
| 2. Utilities cost ( $C_U$ )   |                       |                            |
| Electricity                   | 5.08 cents/kWh        | [36]                       |
| Steam                         | 12.00 \$/t            | SuperPro Designer database |
| Process Water                 | 0.12 \$/t             |                            |
| 3. Labor cost ( $C_L$ )       |                       |                            |
| 4. Facilities cost ( $C_F$ )  |                       |                            |
| Maintenance                   | $0.02 \times C_{PC}$  | [32]                       |
| Depreciation                  | Straight-line method  | [37]                       |
| Insurance                     | $0.01 \times C_{DFC}$ | [32]                       |
| Tax                           | $0.02 \times C_{DFC}$ | [32]                       |
| Plant overhead                | $0.50 \times C_L$     | [32]                       |

**Table S4.** Techno-economic analysis results of bio-glycerol based PSA plant with five different plant scales.

| Plant Scale (t/d) | Total Capital Investment (\$) | Annual Operating Cost (\$) | Revenue (\$) | Unit Production Cost (\$/kg) |
|-------------------|-------------------------------|----------------------------|--------------|------------------------------|
| 1                 | 48,909,738                    | 3,876,334                  | 1,457,553    | 19.37                        |
| 2                 | 51,057,911                    | 4,845,825                  | 2,937,544    | 11.79                        |
| 5                 | 53,681,083                    | 6,393,394                  | 7,348,741    | 5.73                         |
| 10                | 55,937,860                    | 10,313,591                 | 14,705,088   | 4.07                         |
| 40                | 62,293,007                    | 33,506,923                 | 58,801,354   | 2.76                         |

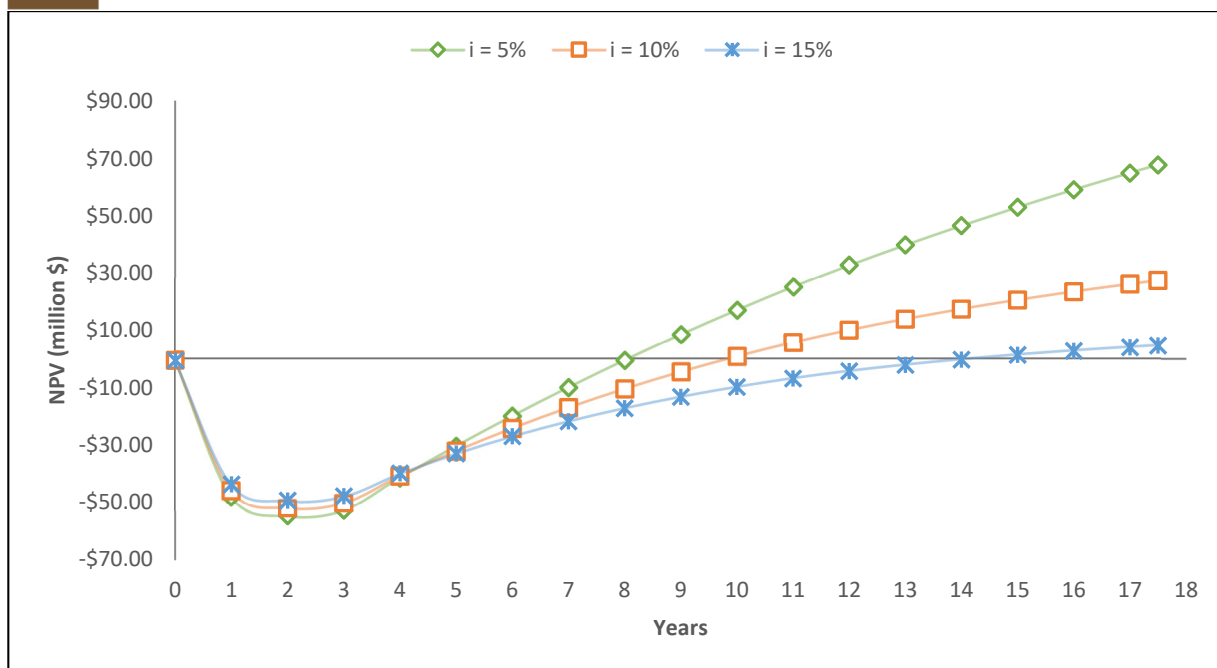

**Figure S1.** Discounted cash flow results for the 40 t/d PSA production plant at different discount rates.  
NPV: net present value.

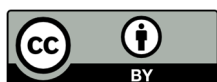

© 2019 by the authors. Submitted for possible open access publication under the terms and conditions of the Creative Commons Attribution (CC BY) license (<http://creativecommons.org/licenses/by/4.0/>).
